# Supplementary material for: A Naturally Occurring Microhomology-Mediated Deletion of Three Genes in African Swine Fever Virus Isolated from Two Sardinian Wild Boars
Source: MDPI journal article supplement (doi:10.3390/v14112524), 2022-11-14
Supplement: s1 [file s1]

**Table S1:** List of primers used in this study for deletion detection.

| Forward       |                      | Reverse       |                     | Start | Stop  | Estimated Size |
|---------------|----------------------|---------------|---------------------|-------|-------|----------------|
| ASFV1-DEL_F   | CAGACGTTGCCTATTCGG   | ASFV1-DEL_R   | GCTGAGAGACAATTTGCG  | 11386 | 12074 | 688            |
| ASFV2-DEL_F   | CCGCAAATTGTCTCTCAG   | ASFV2-DEL_R   | GCTCTGACGTTGACAGCT  | 12056 | 12994 | 938            |
| ASFV3-DEL_F   | GTCTTTCGTCCTTTCCG    | ASFV3-DEL_R   | GGACACCAGTGAACCTG   | 12866 | 12315 | 551            |
| ASFV4-DEL_F   | GCTGTCAACGTCAGAGCA   | ASFV4-DEL_R   | CACCAGTGAACCTGTTTC  | 12964 | 13294 | 330            |
| ASFV5-DEL_F   | AAACAGGTTCACTGGTGTC  | ASFV5-DEL_R   | GTCCAGATAAGCCTGACAT | 13294 | 14241 | 947            |
| ASFV6-DEL_F   | GATGTCAGGCTTATCTGGA  | ASFV6-DEL_R   | ACGGACGTTGTTATCCTGG | 14222 | 15042 | 820            |
| ASFV7-DEL_F   | GCTCCCCAGGATAACAAC   | ASFV7-DEL_R   | GCCATTGCTTTAGCATCT  | 15019 | 15569 | 550            |
| ASFV8-DEL_F   | CTGTACAGATGCTAAAGCAA | ASFV8-DEL_R   | ACATATTTACATCCGTGGC | 15546 | 16400 | 854            |
| ASFVfullDEL_F | CAGACGTTGCCTATTCGG   | ASFVfullDEL_R | ACATATTTACATCCGTGGC | 11386 | 16400 | 5014           |

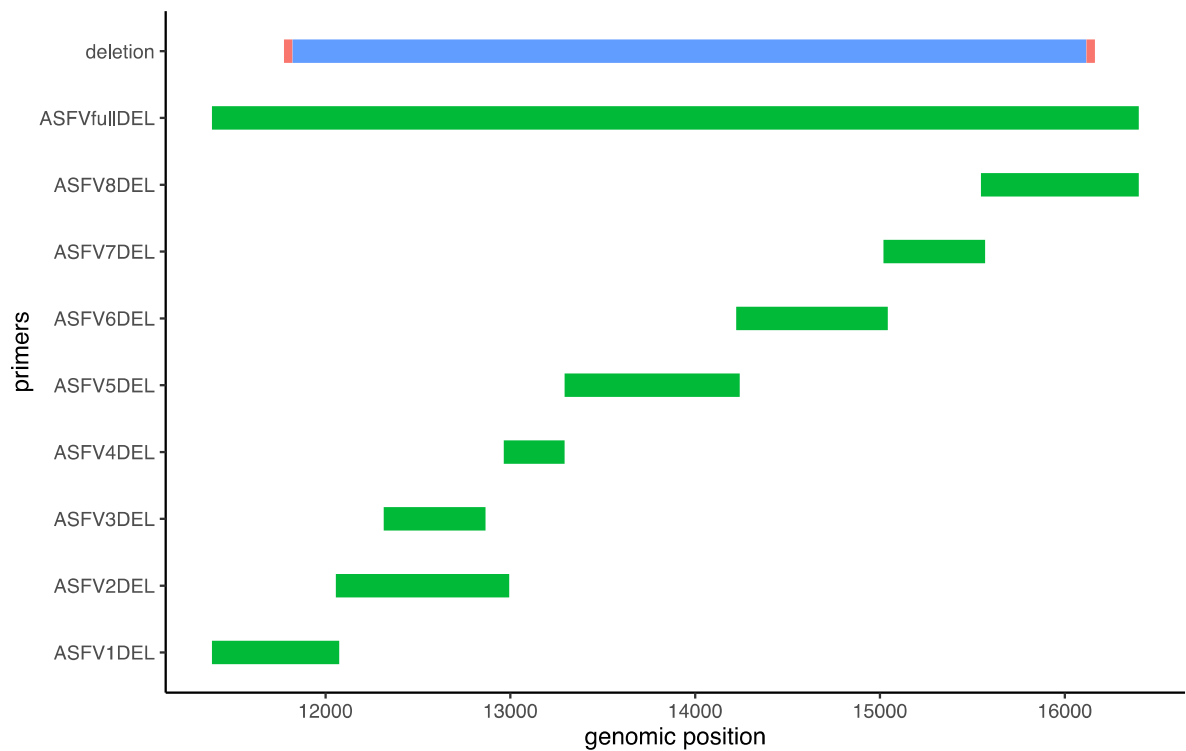

**Figure S1.** Primer locations along the ASFV genome with respect to the reference sequence KX354450. The choice of primers (green bars) was driven by the putative location of the deletion. The location of the deletion (blue bar) and of the regions of perfect microhomology (in red) is shown at the top.

**Table S2:** Metadata associated with ASFV whole genomes analyzed in this study. GenBank accession number and tip labels used in the phylogenetic trees are also reported.

| SeqID              | SeqName          | SampleID    | GenBank     | Host         | Sampling | Country  | City     |
|--------------------|------------------|-------------|-------------|--------------|----------|----------|----------|
| PRT LISB 1960      | PRT LISB 1960    | L60         | NC044941    | Domestic Pig | 1960     | Portugal | Lisbon   |
| ESP 1975           | ESP 1975         | E75         | NC044958    | Domestic Pig | 1975     | Spain    |          |
| ITA CA 1 1978      | ITA CA 1 1978    | 56/Ca/1978  | MN270969    | Domestic Pig | 1978     | Italy    | Cagliari |
| ITA CA 2 1978      | ITA CA 2 1978    | CA1978_2    | MW723480    | Domestic Pig | 1978     | Italy    | Cagliari |
| ITA NU 1979        | ITA NU 1979      | NU1979      | MW723481    | Domestic Pig | 1979     | Italy    | Nuoro    |
| ITA CA 1979        | ITA CA 1979      | 57/Ca/1979  | MN270970    | Domestic Pig | 1979     | Italy    | Cagliari |
| ITA SS 1981        | ITA SS 1981      | SS1981      | MW788409    | Domestic Pig | 1981     | Italy    | Sassari  |
| ITA NU 1 1981      | ITA NU 1 1981    | 139/Nu/1981 | MN270971    | Domestic Pig | 1981     | Italy    | Sassari  |
| ITA NU 2 1981      | ITA NU 2 1981    | NU1981_2    | SRR13976567 | Domestic Pig | 1981     | Italy    | Nuoro    |
| ITA TO 1983        | ITA TO 1983      | ITALY1983   | SRR13976568 | Domestic Pig | 1983     | Italy    | Torino   |
| ITA OR 1984        | ITA OR 1984      | OR1984      | MW800838    | Domestic Pig | 1984     | Italy    | Oristano |
| ITA OR 1985        | ITA OR 1985      | 140/Or/1985 | MN270972    | Domestic Pig | 1985     | Italy    | Oristano |
| ITA CA 1985        | ITA CA 1985      | 85/Ca/1985  | MN270973    | Domestic Pig | 1985     | Italy    | Cagliari |
| ITA NU 1986        | ITA NU 1986      | NU1986      | MW723482    | Domestic Pig | 1986     | Italy    | Nuoro    |
| ITA NU 1 1990      | ITA NU 1 1990    | NU1990_1    | MW723483    | Domestic Pig | 1990     | Italy    | Nuoro    |
| ITA NU 2 1990      | ITA NU 2 1990    | NU1990_2    | SRR13976561 | Domestic Pig | 1990     | Italy    | Nuoro    |
| ITA NU 3 1990      | ITA NU 3 1990    | 141/Nu/1990 | MN270974    | Domestic Pig | 1990     | Italy    | Nuoro    |
| ITA NU 2 1991      | ITA NU 2 1991    | NU1991_2    | MW723484    | Domestic Pig | 1991     | Italy    | Nuoro    |
| ITA NU 3 1991      | ITA NU 3 1991    | NU1991_3    | MW723485    | Domestic Pig | 1991     | Italy    | Nuoro    |
| ITA NU 7 1991      | ITA NU 7 1991    | NU1991_7    | MW723486    | Domestic Pig | 1991     | Italy    | Nuoro    |
| ITA NU 9 1991      | ITA NU 9 1991    | NU1991_9    | SRR13976566 | Domestic Pig | 1991     | Italy    | Nuoro    |
| ITA NU 1993-07-1   | ITA NU Jul-1993  | NU1993_2    | MW723488    | Domestic Pig | 01/07/93 | Italy    | Nuoro    |
| ITA OR 1993        | ITA OR 1993      | OR1993_1    | MW723487    | Domestic Pig | 1993     | Italy    | Oristano |
| ITA NU 1 1995      | ITA NU 1 1995    | 142/Nu/1995 | MN270975    | Domestic Pig | 1995     | Italy    | Nuoro    |
| ITA NU 2 1995      | ITA NU 2 1995    | NU1995_2    | MW723489    | Domestic Pig | 1995     | Italy    | Nuoro    |
| ITA NU 3 1995      | ITA NU 3 1995    | NU1995_3    | MW723490    | Domestic Pig | 1995     | Italy    | Nuoro    |
| ITA NU 4 1995      | ITA NU 4 1995    | NU1995_4    | MW723491    | Domestic Pig | 1995     | Italy    | Nuoro    |
| BEN 1997           | BEN 1997         | BENIN_1997  | NC044956    | Domestic Pig | 1997     | Benin    |          |
| ITA TEM 2002-04-19 | ITA TEM Apr-2002 | 24225_2002  | MW788411    | Domestic Pig | 19/04/02 | Italy    | Tempio   |
| ITA ORU 2004-07-7  | ITA ORU Jul-2004 | 44076_2004  | MW723500    | Domestic Pig | 07/07/04 | Italy    | Orune    |
| ITA MAC 2004-07-12 | ITA MAC Jul-2004 | 45539_2004  | SRR13976563 | Domestic Pig | 12/07/04 | Italy    | Macomer  |
| ITA BUL 2004-10-5  | ITA BUL Oct-2004 | 26/Ss/2004  | MN270977    | Domestic Pig | 05/10/04 | Italy    | Bultei   |
| ITA TEL 2004-11-26 | ITA TEL Nov-2004 | 74377_2004  | MW723496    | Domestic Pig | 26/11/04 | Italy    | Telti    |

|                      |                    |               |             |              |          |       |               |
|----------------------|--------------------|---------------|-------------|--------------|----------|-------|---------------|
| ITA SAD 2005-05-5    | ITA SAD May-2005   | 22649_2005    | MW723497    | Domestic Pig | 05/05/05 | Italy | Sadali        |
| ITA PAL 2005-12-1    | ITA PAL Dec-2005   | 72398WB_2005  | MW723495    | Wild boar    | 01/12/05 | Italy | Palau         |
| ITA TER 2007-11-23   | ITA TER Nov-2007   | 72407_2007    | MN270978    | Domestic Pig | 23/11/07 | Italy | Tergu         |
| ITA URZ 2007-03-11   | ITA URZ Mar-2007   | 72912WB_2007  | MW723498    | Wild boar    | 11/03/07 | Italy | Urzulei       |
| ITA URZ 2008-01-6    | ITA URZ Jan-2008   | 1537WB_2008   | MW788405    | Wild boar    | 06/01/08 | Italy | Urzulei       |
| ITA TAL 2008-01-20   | ITA TAL Jan-2008   | 4996WB_2008   | MW723492    | Wild boar    | 20/01/08 | Italy | Talana        |
| ITA BEN 2008-04-10   | ITA BEN 1 Apr-2008 | 22137_2008    | MW723499    | Domestic Pig | 10/04/08 | Italy | Benetutti     |
| ITA VIL 2008-04-16   | ITA VIL 1 Apr-2008 | 22943_2008    | MW788406    | Domestic Pig | 16/04/08 | Italy | Villasor      |
| ITA VIL 2008-04-17   | ITA VIL 2 Apr-2008 | 23221_2008    | MW723494    | Domestic Pig | 17/04/08 | Italy | Villasor      |
| ITA BEN 2008-04-28   | ITA BEN 2 Apr-2008 | 25185_2008    | MW788410    | Domestic Pig | 28/04/08 | Italy | Benetutti     |
| ITA STI 2008-06-1    | ITA STI Jun-2008   | 46830_2008    | MW723493    | Domestic Pig | 01/06/08 | Italy | Stintino      |
| ITA STI 2008-09-1    | ITA STI Sep-2008   | 47/Ss/2008    | KX354450    | Domestic Pig | 01/09/08 | Italy | Stintino      |
| ITA ORU 2009-01-15   | ITA ORU Jan-2009   | 1628_2009     | SRR14601691 | Wild boar    | 15/01/19 | Italy | Orune         |
| ITA ONI 2009-05-22   | ITA ONI May-2009   | 28170_2009    | SRR13976565 | Domestic Pig | 22/05/09 | Italy | Oniferi       |
| ITA BAU 2010-05-20   | ITA BAU May-2010   | 26544/OG10    | KM102979    | Domestic Pig | 20/05/10 | Italy | Baunei        |
| ITA BONO 2011-06-14  | ITA BONO Jun-2011  | 31208_2011    | MW736612    | Domestic Pig | 14/06/11 | Italy | Bono          |
| ITA ALA 2012-02-12   | ITA ALA Feb-2012   | 2019WB_2012   | MW736598    | Wild boar    | 12/02/12 | Italy | Ala dei Sardi |
| ITA OSC 2012-04-18   | ITA OSC Apr-2012   | 97/Ot/2012    | MN270979    | Domestic Pig | 18/04/12 | Italy | Oschiri       |
| ITA BIT 2011-12-30   | ITA BIT Dec-2011   | 63525WB_2011  | MW736603    | Wild boar    | 30/12/11 | Italy | Bitti         |
| ITA BUD 2013-03-25   | ITA BUD Mar-2013   | 30322_2013    | MW736600    | Domestic Pig | 25/03/13 | Italy | Budduso       |
| ITA BON 2013-04-3    | ITA BON Apr-2013   | 32516_2013    | MW736607    | Domestic Pig | 03/04/13 | Italy | Bonorva       |
| ITA PAT 2013-05-20   | ITA PAT May-2013   | 47039_2013    | MW736597    | Domestic Pig | 20/05/13 | Italy | Pattada       |
| ITA BOL 2013-05-27   | ITA BOL May-2013   | 49179WB_2013  | MW736601    | Wild boar    | 27/05/13 | Italy | Bolotana      |
| ITA PAT 2013-11-11   | ITA PAT Nov-2013   | 98039_2013    | MW736599    | Domestic Pig | 11/11/13 | Italy | Pattada       |
| ITA NUL 2013-12-16   | ITA NUL Dec-2013   | 113049WB_2013 | MW736608    | Wild boar    | 16/12/13 | Italy | Nulvi         |
| ITA CAS 2014-01-27   | ITA CAS Jan-2014   | 11484WB_2014  | SRR13975654 | Wild boar    | 27/01/14 | Italy | Castelsardo   |
| ITA VILLA 2014-02-21 | ITA VILLA Feb-2014 | 22653/Ca/2014 | MN270980    | Domestic Pig | 21/02/14 | Italy | Villanovatulo |
| ITA BON 2014-03-31   | ITA BON Mar-2014   | 35479_2014    | MW788408    | Domestic Pig | 31/03/14 | Italy | Bonorva       |
| ITA TER 2014-06-3    | ITA TER Jun-2014   | 51268_2014    | MW736605    | Domestic Pig | 03/06/14 | Italy | Tergu         |
| ITA BEN 2015-01-14   | ITA BEN Jan-2015   | 6396WB_2015   | MW736609    | Wild boar    | 14/01/15 | Italy | Benetutti     |
| ITA ORG 2015-02-10   | ITA ORG Feb-2015   | 15998_2015    | MW736604    | Domestic Pig | 10/02/15 | Italy | Orgosolo      |
| ITA BON 2015-03-25   | ITA BON Mar-2015   | 28928_2015    | MW736610    | Domestic Pig | 25/03/15 | Italy | Bonorva       |
| ITA SEN 2015-04-10   | ITA SEN Apr-2015   | 31479_2015    | MW788407    | Domestic Pig | 10/04/15 | Italy | Sennori       |
| ITA ANE 2015-04-21   | ITA ANE Apr-2015   | 33747WB_2015  | MW736613    | Wild boar    | 21/04/15 | Italy | Anela         |
| ITA SAR 2016-06-16   | ITA SAR Jun-2016   | 53706_2016    | MW736602    | Domestic Pig | 16/06/16 | Italy | Sarule        |

|                     |                    |              |             |                  |          |       |           |
|---------------------|--------------------|--------------|-------------|------------------|----------|-------|-----------|
| ITA DOL 2017-01-10  | ITA DOL Jan-2017   | 3312_2017    | SRR13976564 | Domestic Pig     | 10/01/17 | Italy | Dolianova |
| ITA DES 2017-03-14  | ITA DES Mar-2017   | 34403WB_2017 | MW736606    | Wild boar        | 14/03/17 | Italy | Desulo    |
| ITA SEUI 2017-05-23 | ITA SEUI May-2017  | 52060_2018   | SRR13976569 | Free Ranging Pig | 23/05/17 | Italy | Seui      |
| ITA ARI 2018-01-15  | ITA ARI Jan-2018   | 8343_2018    | SRR13976571 | Free Ranging Pig | 15/01/18 | Italy | Aritzo    |
| ITA LOT 2018-06-8   | ITA LOT 1 Jun-2018 | 54684_2018   | MW647171    | Free Ranging Pig | 08/06/18 | Italy | Lotzorai  |
| ITA LOT 2018-06-14  | ITA LOT 2 Jun-2018 | 56140_2018   | MW736611    | Free Ranging Pig | 14/06/18 | Italy | Lotzorai  |
| ITA DES 2018-06-15  | ITA DES Jun-2018   | 55234_2018   | MT932579    | Free Ranging Pig | 11/06/18 | Italy | Desulo    |
| ITA TAL 2018-12-15  | ITA TAL Dec-2018   | 103917_2018  | MT932578    | Free Ranging Pig | 17/12/18 | Italy | Talana    |
| ITA LAN 2019-01-14  | ITA LAN Jan-2019   | 7212_2019    | ON260838    | Wild boar        | 14/01/19 | Italy | Lanusei   |
| ITA PAT 2019-01-14  | ITA PAT Jan-2019   | 7303_2019    | ON260839    | Wild boar        | 13/01/19 | Italy | Pattada   |

**Table S3:** Metadata associated with ASFV microhomology analysis.

| Sequence name                                                                                                   | Country      | Genotype |
|-----------------------------------------------------------------------------------------------------------------|--------------|----------|
| KX354450.1 African swine fever virus isolate 47/Ss/2008, complete genome                                        | Italy        | I        |
| MN270969.1 African swine fever virus isolate 56/Ca/1978, complete genome                                        | Italy        | I        |
| NC_044958.1 African swine fever virus E75 complete genome, strain E75                                           | Spain        | I        |
| NC_044941.1 African swine fever virus strain L60, complete genome                                               | Portugal     | I        |
| MN913970.1 African swine fever virus strain Liv13/33 (OmLF2) isolate OmLF2, complete genome                     | France       | I        |
| NC_044957.1 African swine fever virus OURT 88/3 (avirulent field isolate), complete genome                      | Portugal     | I        |
| U18466.2 African swine fever virus strain BA71V, complete genome                                                | Spain        | I        |
| NC_044943.1 African swine fever virus strain NHV, complete genome                                               | Portugal     | I        |
| NC_044959.2 African swine fever virus isolate ASFV Georgia 2007/1 genome assembly, complete genome: monopartite | Georgia      | II       |
| AY261365.1 African swine fever virus isolate Warmbaths, complete genome                                         | South Africa | III      |
| MN641876.2 African swine fever virus isolate RSA_W1_1999, complete genome                                       | South Africa | IV       |
| AY261361.1 African swine fever virus isolate Malawi Lil-20/1 (1983), complete genome                            | Malawi       | VIII     |
| MH025916.1 African swine fever virus strain R8, complete genome                                                 | Uganda       | IX       |
| MW856067.1 African swine fever virus strain BUR/18/Rutana, complete genome                                      | Burundi      | X        |
| MN641877.2 African swine fever virus isolate RSA_2_2004, complete genome                                        | South Africa | XX       |
| MN336500.3 African swine fever virus isolate RSA_2_2008, complete genome                                        | South Africa | XXII     |

**Table S4:** Deletions and changes between the two isolates under study with the reference strain KX354450. Genome position, nucleotide, type of mutation, and predicted features are reported.

| Gene      | Genome Position | Ref         | Alt_7212WB/19 | Alt_7303WB/19 | Aa_chg | Mutation | Predicted features      |
|-----------|-----------------|-------------|---------------|---------------|--------|----------|-------------------------|
| IG        | 11820..12052    | no deletion | deletion      | deletion      |        |          | Intergenic region       |
| MGF360-6L | 12053..13180    | no deletion | deletion      | deletion      |        |          | MGF360 family           |
| IG        | 13181..14063    | no deletion | deletion      | deletion      |        |          | Intergenic region       |
| X69R      | 14064..14273    | no deletion | deletion      | deletion      |        |          | Uncharacterized protein |
| IG        | 14274..14459    | no deletion | deletion      | deletion      |        |          | Intergenic region       |

|                |              |             |          |          |            |                |                                                |
|----------------|--------------|-------------|----------|----------|------------|----------------|------------------------------------------------|
| MGF300-1L      | 14460..15266 | no deletion | deletion | deletion |            |                | MGF300 family                                  |
| IG             | 15267..16162 | no deletion | deletion | deletion |            |                | Intergenic region                              |
| MGF 505-3R (*) | 30649        | A           | G        | G        | Silent     | Point mutation | MGF505 family                                  |
| IG (*)         | 34552        | T           | C        | C        | NA         | Point mutation | Intergenic region                              |
| MGF360-15R (*) | 45961        | T(7)        | T(8)     | T(8)     | Frameshift | INDEL          | MGF360 family                                  |
| URF19 (*)      | 54920        | C           | T        | T        | Y21C       | Point mutation | Undefined reading frame (Hypothetical protein) |
| EP364R (*)     | 71175        | A           | G        | G        | A319T      | Point mutation | XPF_NUCLEASE-LIKE                              |
| EP364R (*)     | 71216        | A           | G        | G        | Silent     | Point mutation | XPF_NUCLEASE-LIKE                              |
| URF22 (*)      | 77296        | A(9)        | A(10)    | A(10)    | Frameshift | INDEL          | Undefined reading frame (Hypothetical protein) |
| C315R (*)      | 83384        | T           | C        | C        | Silent     | Point mutation | TFIIB-like factor                              |
| IG (*)         | 95173        | G           | A        | A        | NA         | NA             | Intergenic region                              |
| IG (*)         | 110196       | G           | A        | A        | NA         | NA             | Intergenic region                              |
| D205R (*)      | 140311       | G           | A        | A        | P131S      | Point mutation | RNA polymerase subunit 5                       |
| S273R          | 142703       | G           | A        | A        | Silent     |                | Cysteine protease S273R                        |
| URF56 (*)      | 152555       | G(5)        | G(6)     | G(6)     | Frameshift |                | Undefined reading frame (Hypothetical protein) |
| IG (*)         | 176705       | A(7)        | A(8)     | A(8)     | Na         |                | Intergenic region                              |
| IG (*)         | 179838       | C(9)        | C(10)    | C(10)    | Na         |                | Intergenic region                              |

(\*): changes in Sardinian ASFV isolates already described [16,50]

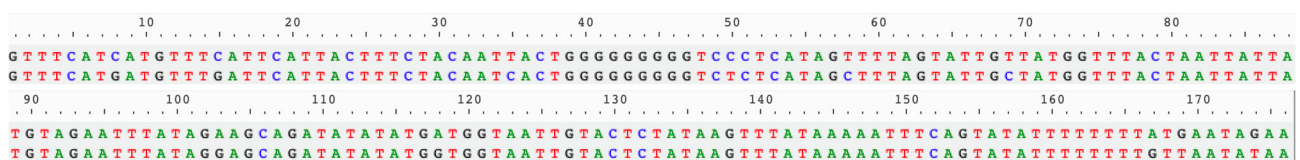

**Figure S2.** Alignment of the two regions of imperfect microhomology starting at positions 11656 and 15998 of the Sardinian ASFV reference sequence (KX354450).

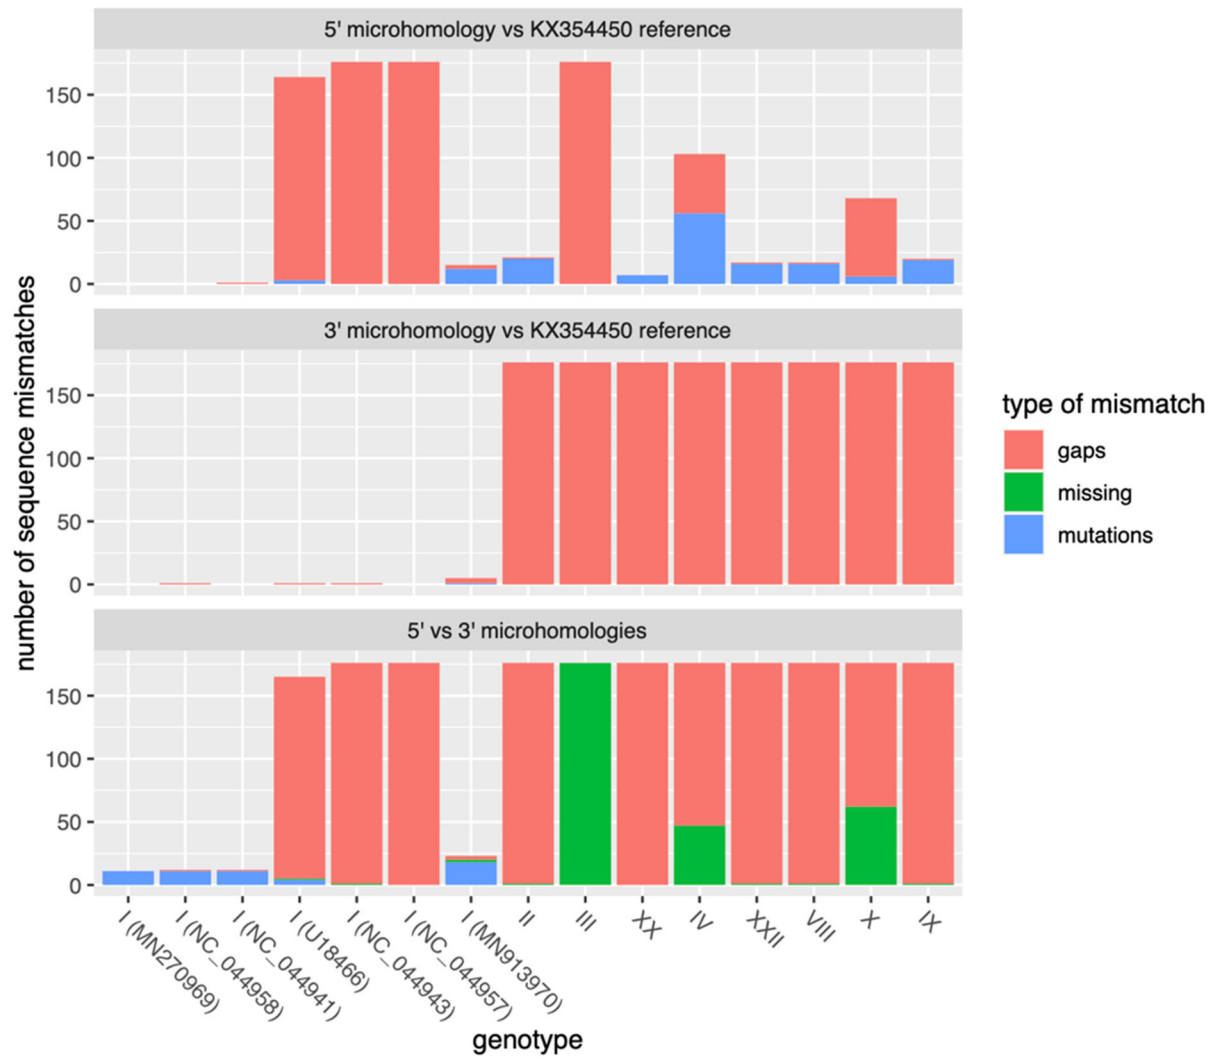

**Figure S3.** Conservation of the imperfect microhomology and the two 176 bp sequences involved (one at the 5' end of the deletion, one at the 3') among ASFV genotypes. Top: number of mismatches between the sequence closer to the 5' end of the genome in KX354450 and the corresponding sequences in other samples from different genotypes, ordered by genomic divergence from KX354450. Middle: mismatches between the sequence closer to the 3' end of the genome in KX354450 and the corresponding sequences in other samples from different genotypes. Bottom: mismatches between the two sequences from the same sample. "Missing" denotes bases that are missing (i.e. contain gaps in the alignment) for both sequences.
